# Supplementary material
Source: publisher figshare collection journal article supplement (https://acs.figshare.com/ndownloader/files/7449004)
Supplement: Supplementary file 1 [file 7449004]

# Supporting Information

## Two-Dimensional SnS: A Phosphorene Analogue with Strong In-Plane Electronic Anisotropy

*Zhen Tian,<sup>1,2,3</sup> Chenglei Guo,<sup>1,2,3</sup> Mingxing Zhao,<sup>2,3</sup> Ranran Li,<sup>2,3</sup> and Jiamin Xue<sup>1,2,3,4\*</sup>*

<sup>1</sup>Shanghai Institute of Optics and Fine Mechanics, Chinese Academy of Sciences, Shanghai  
201800, China

<sup>2</sup>School of Physical Science and Technology, ShanghaiTech University, Shanghai 201210, China

<sup>3</sup>University of Chinese Academy of Sciences, Beijing 100049, China

<sup>4</sup>Center for Excellence in Superconducting Electronics (CENSE), Chinese Academy of Sciences,  
Shanghai 200050, China

\*xuejm@shanghaitech.edu.cn

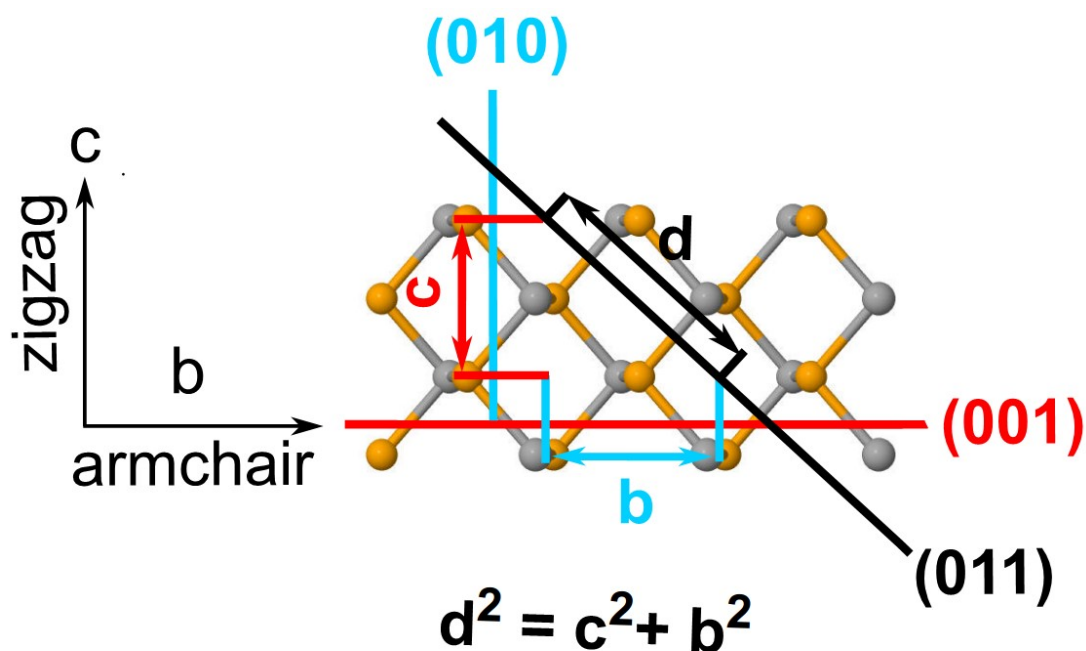

**density of dangling bonds:**

$$2/c > 2/b > 2/d$$

**Figure S1.** Procedure for calculating the density of dangling bonds at different planes. At the (010) plane, we can see that every two bonds take a length of  $c$ . While for the (001) and (011) planes, every two bonds take a length of  $b$  and  $d$ , respectively. Since  $c$ ,  $b$  and  $d$  form a right triangle, we have  $d^2 = c^2 + b^2$ . Then the density of dangling bonds at the (011) planes is the lowest, hence thermodynamically most stable.

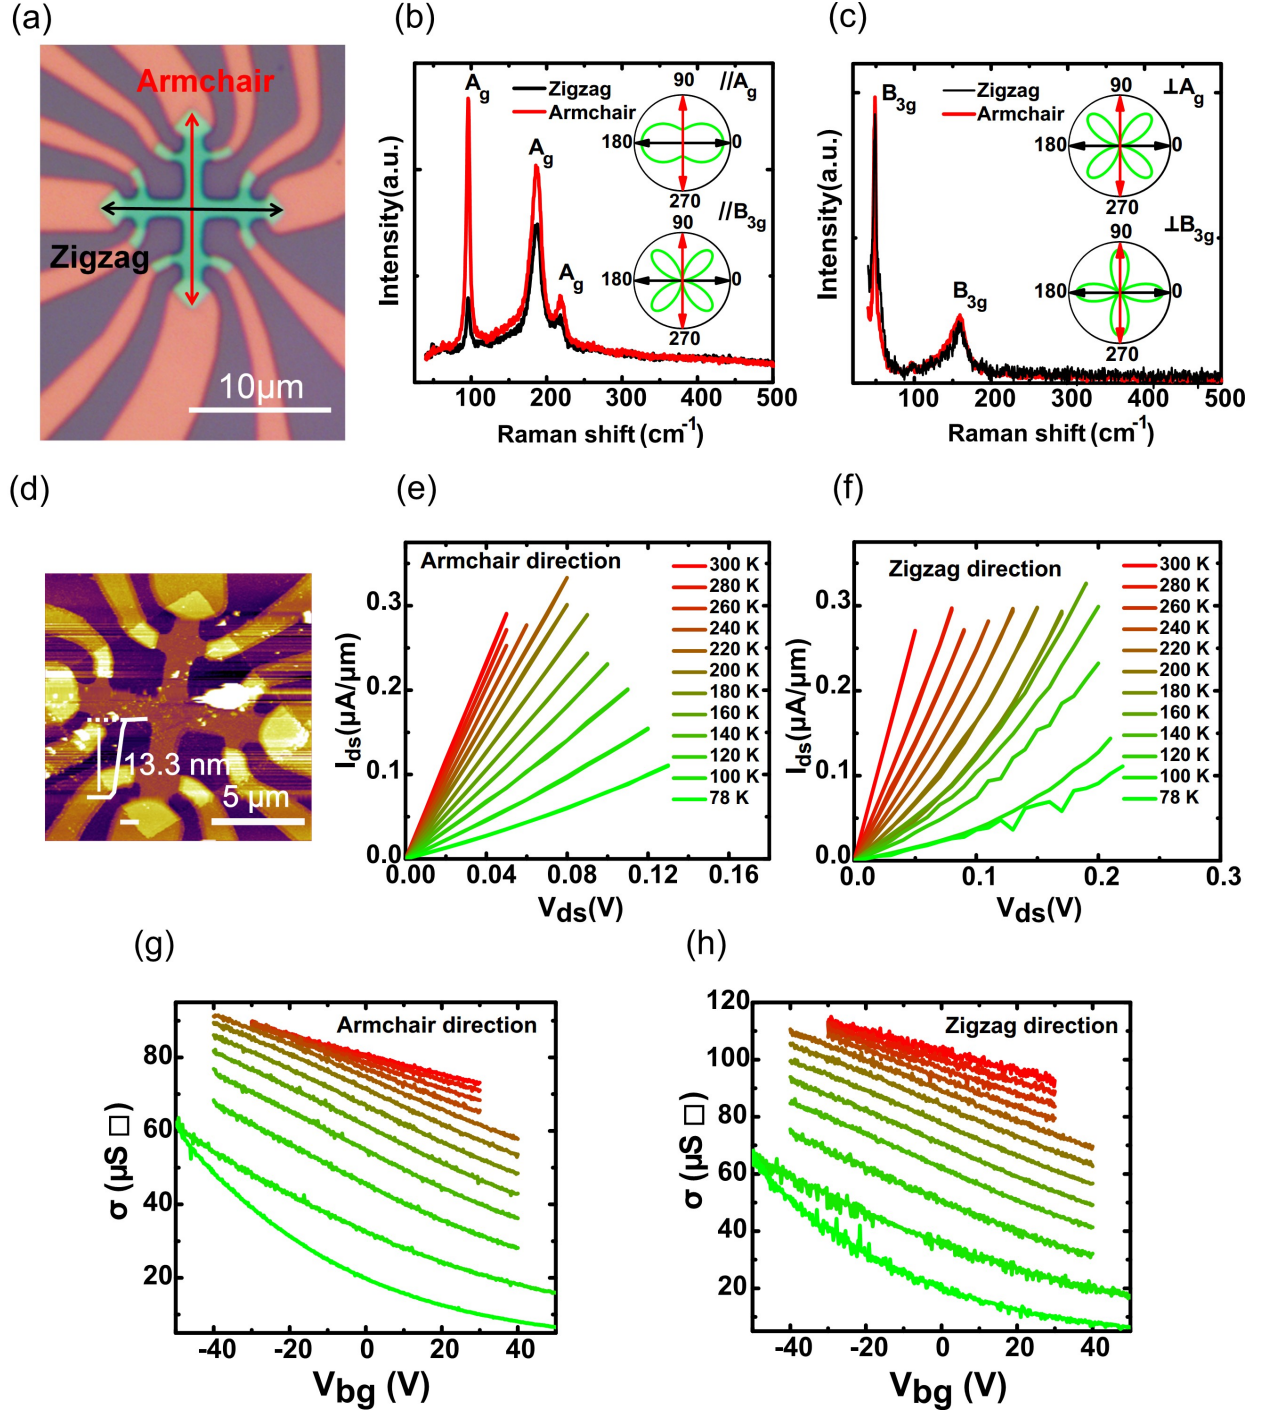

**Figure S2.** (a, d) OM and AFM images of a 13.3 nm SnS FET device on 300 nm SiO<sub>2</sub> substrate. (b, c) Raman spectra of the SnS FET device shown in (a) and (d) with the polarization of incident and scattered light parallel (b) and perpendicular (c), respectively. (e, f) The  $I_{ds}$ - $V_{ds}$  plots at various  $T$  along the armchair and zigzag directions respectively with the back gate grounded.

(g, h) The channel sheet conductivity  $\sigma$  versus  $V_{bg}$  at different  $T$  along the armchair and zigzag directions. Again it is easy to see that the zigzag direction has the higher mobility.

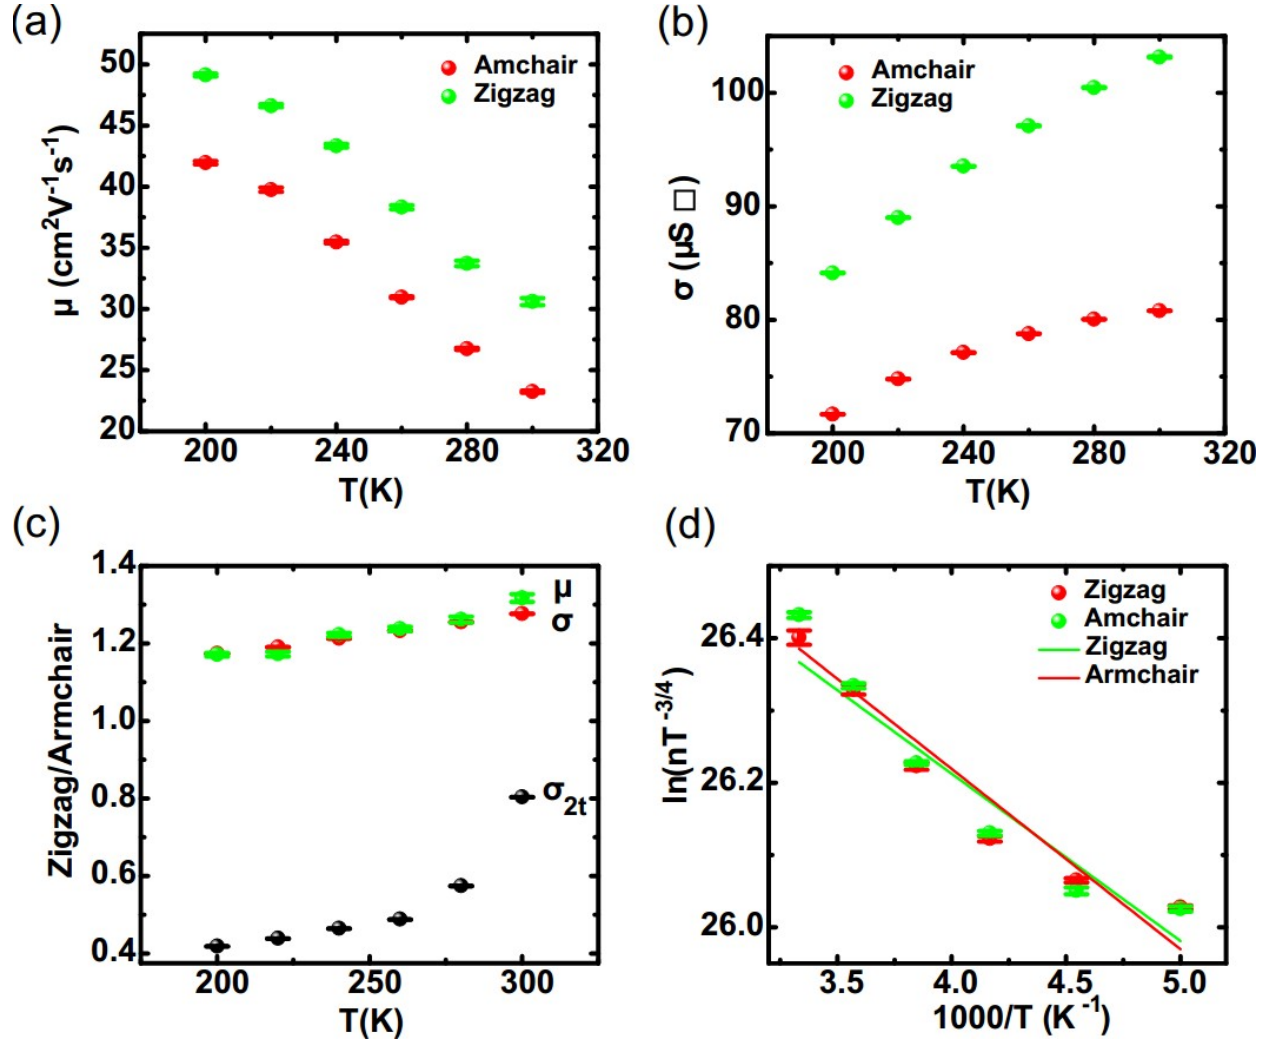

**Figure S3.** (a, b) The mobility  $\mu$  and the four-terminal sheet conductivity  $\sigma$  extracted from Figures S2(g) and (h) at zero gate voltage. (c) The ratios of  $\mu$ ,  $\sigma$  and two-terminal conductivity  $\sigma_{2t}$  between zigzag and armchair directions at various  $T$ . (d)  $\ln nT^{-3/4}$  as a function of  $1000/T$ . The solid lines are linear fits of the data with activation energy  $E_a$  of  $43 \pm 2$  meV along the armchair direction and  $41 \pm 2$  meV along the zigzag direction.
